# Supplementary figures and images for: Long-read sequencing reveals HBV integration patterns and oncogenic impact on early-onset hepatocellular carcinoma
Source: HighWire-hosted journal article supplement (doi:10.1101/gr.279889.124), 2025-09-16

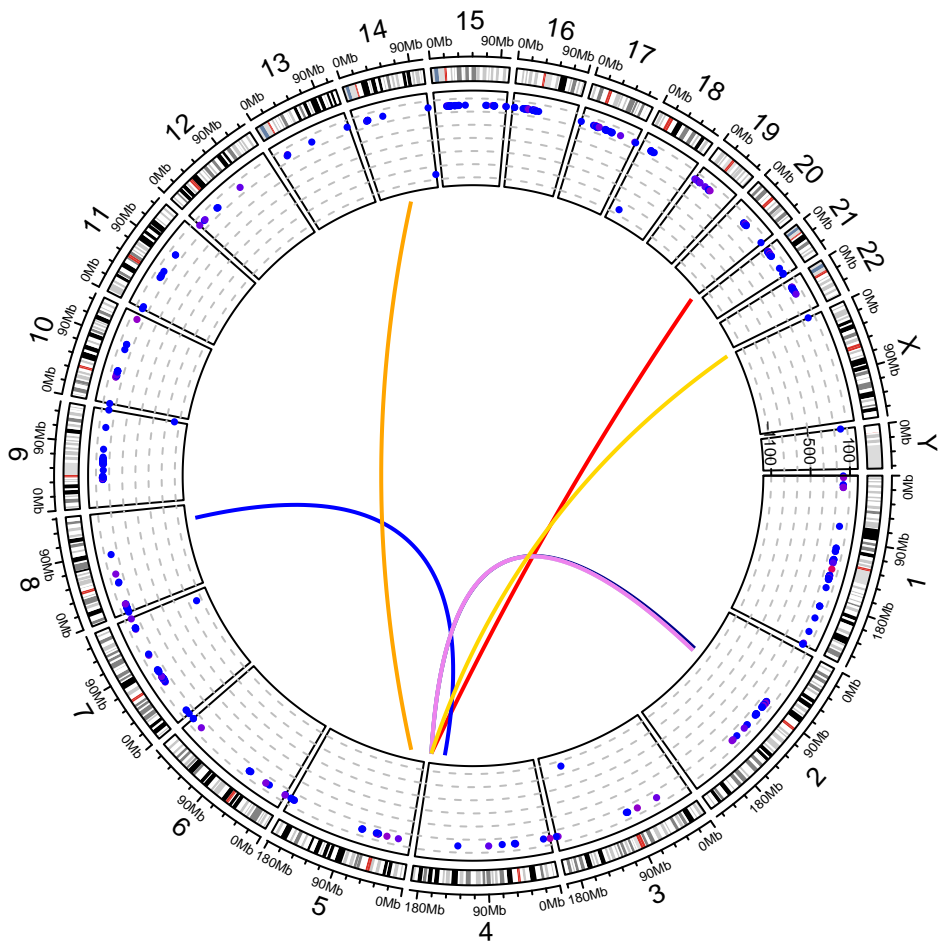

Supplement: Supplemental_Code_.zip [file L4.pdf › CIRCLIZE3/L4.pdf]

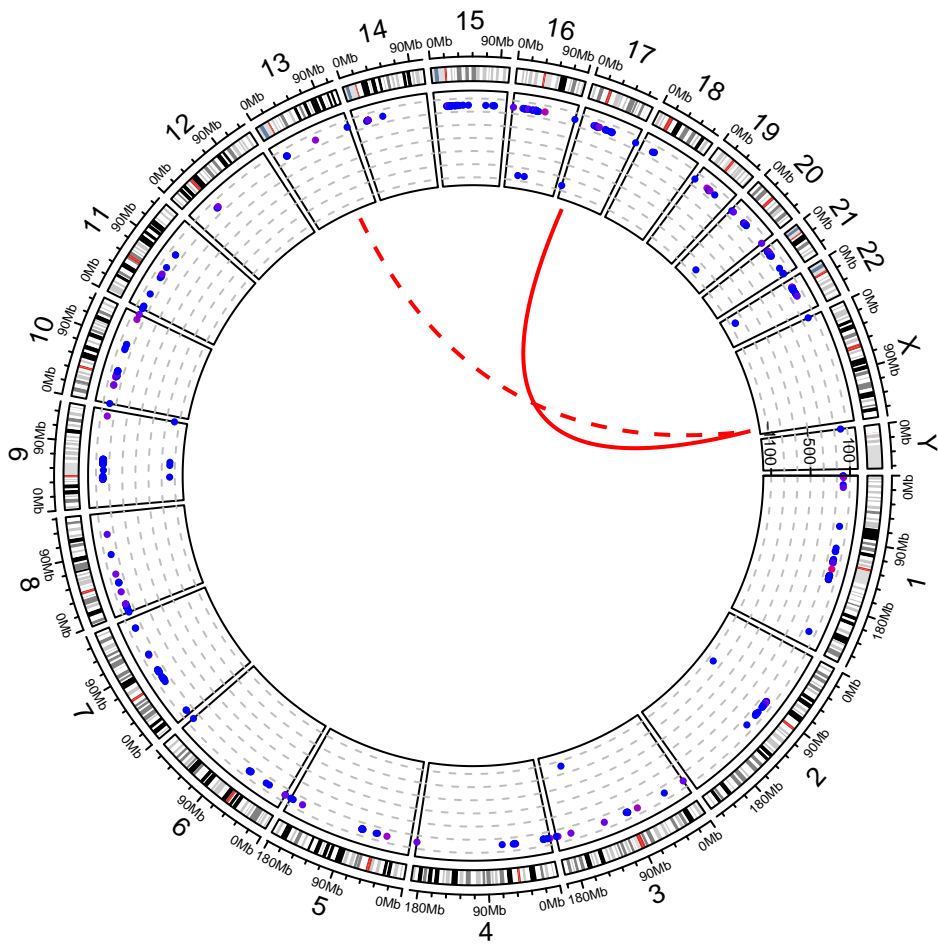

Supplement: Supplemental_Code_.zip [file L6.pdf › CIRCLIZE3/L6.pdf]

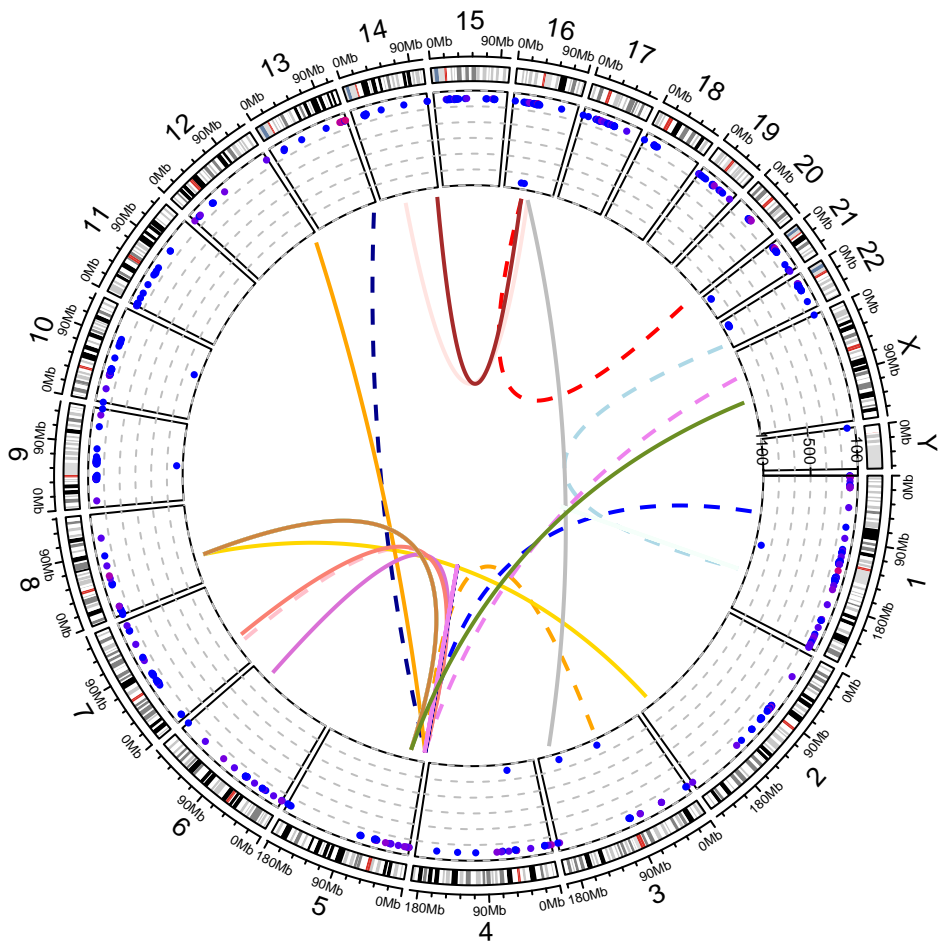

Supplement: Supplemental_Code_.zip [file T1.pdf › CIRCLIZE3/T1.pdf]

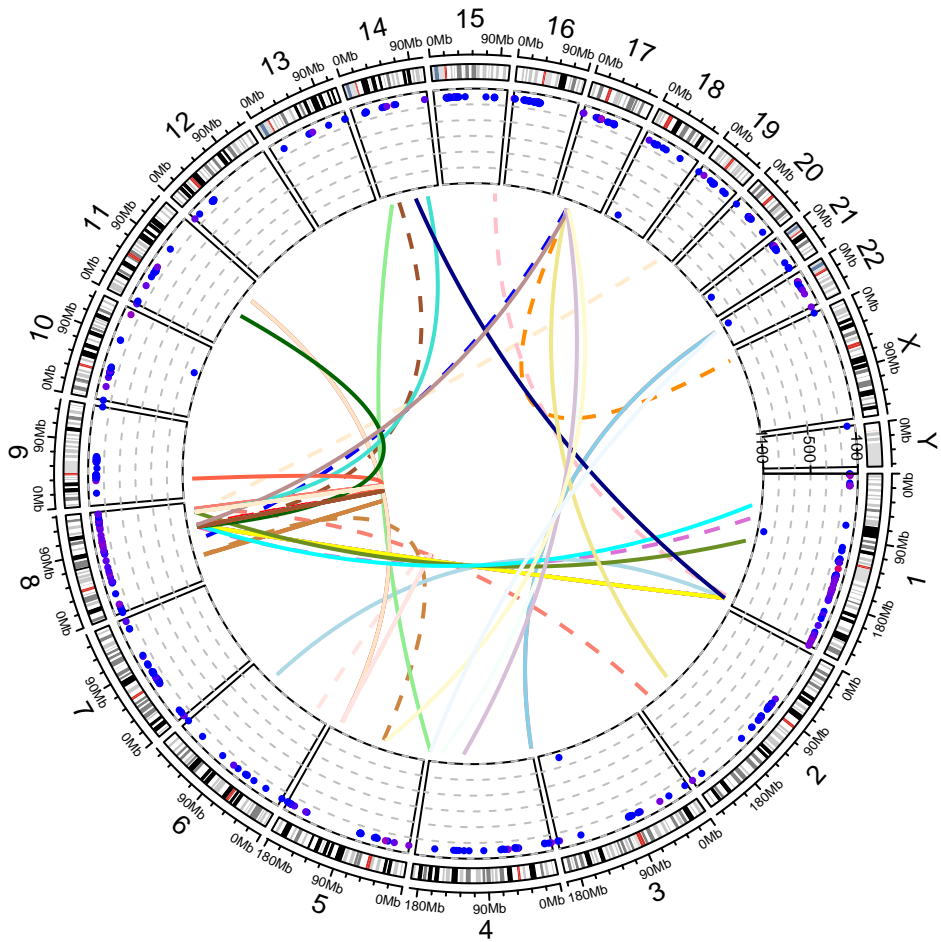

Supplement: Supplemental_Code_.zip [file T2.pdf › CIRCLIZE3/T2.pdf]

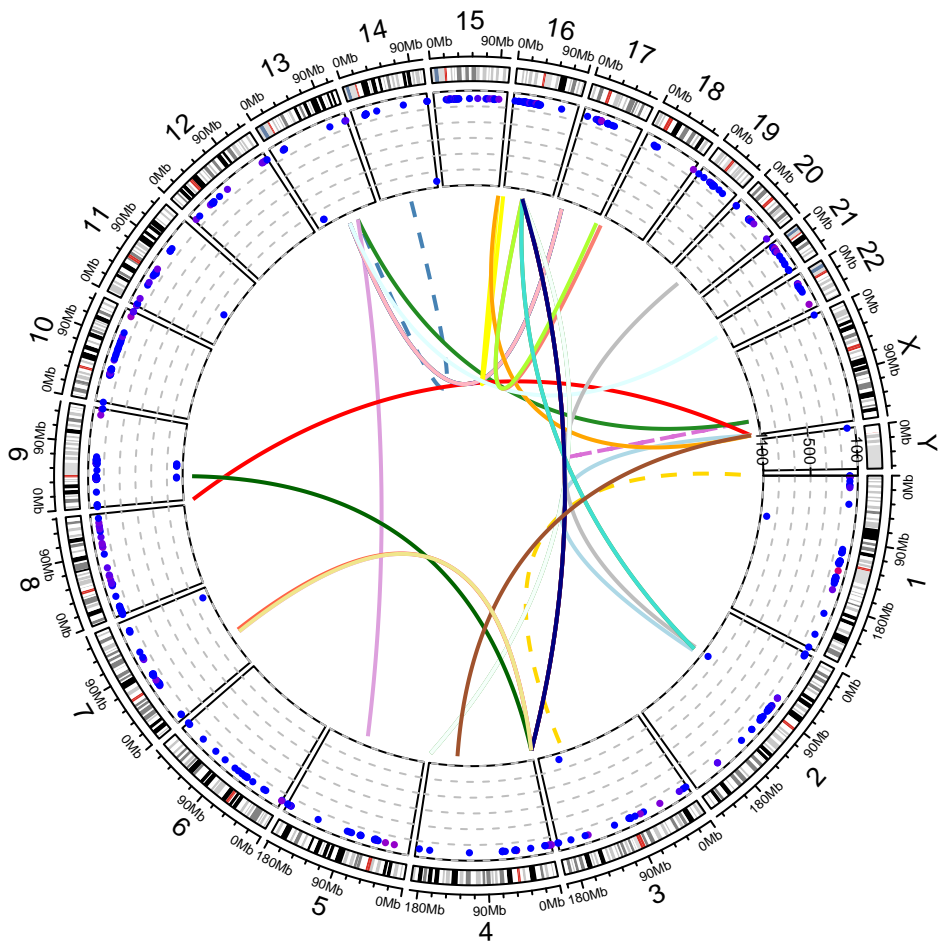

Supplement: Supplemental_Code_.zip [file T3.pdf › CIRCLIZE3/T3.pdf]

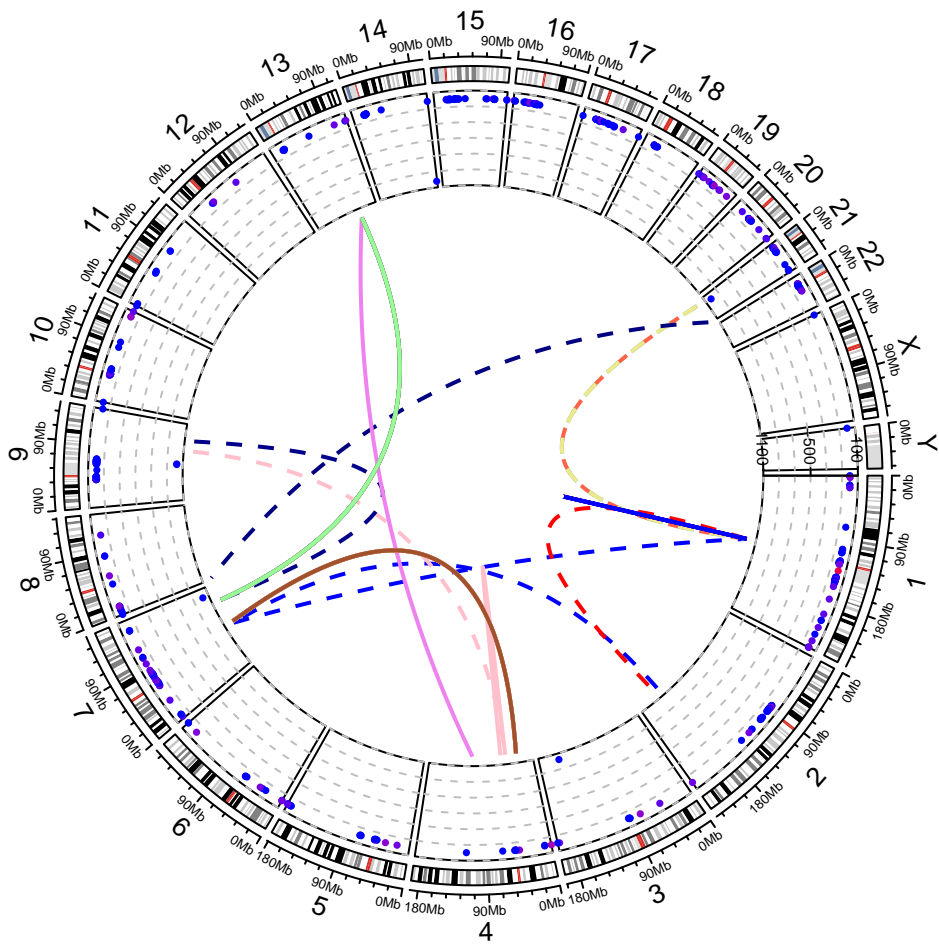

Supplement: Supplemental_Code_.zip [file T4.pdf › CIRCLIZE3/T4.pdf]

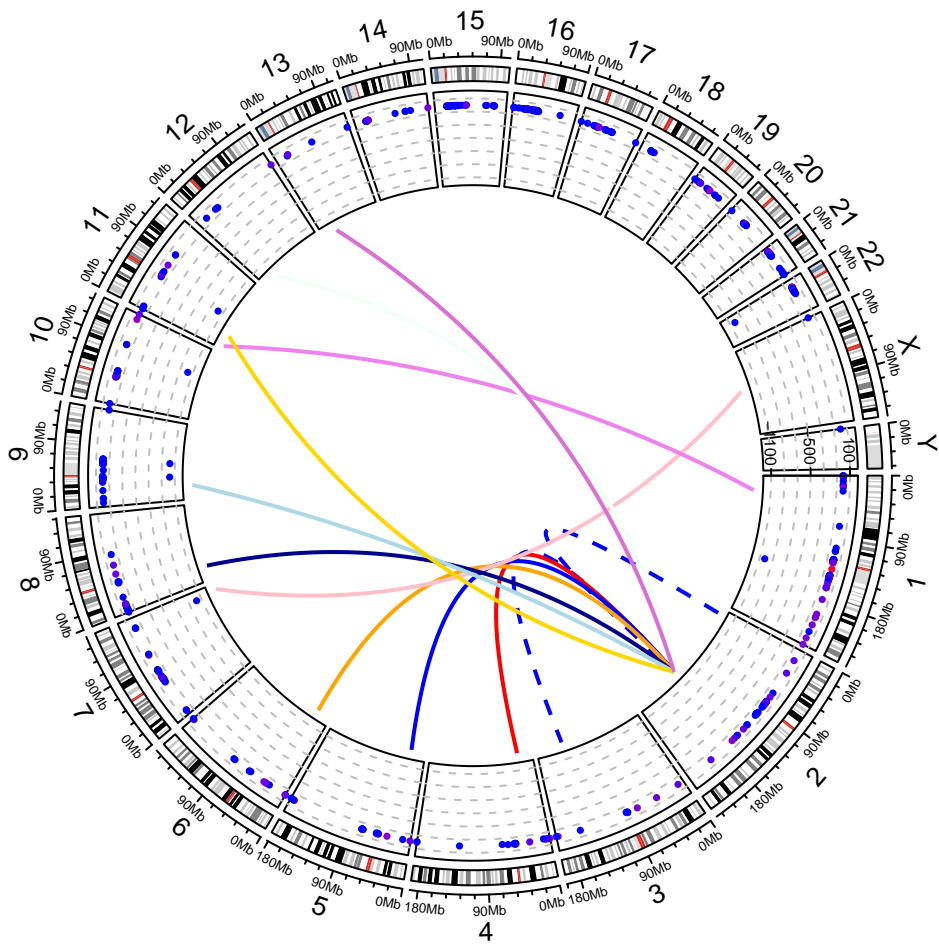

Supplement: Supplemental_Code_.zip [file T5.pdf › CIRCLIZE3/T5.pdf]

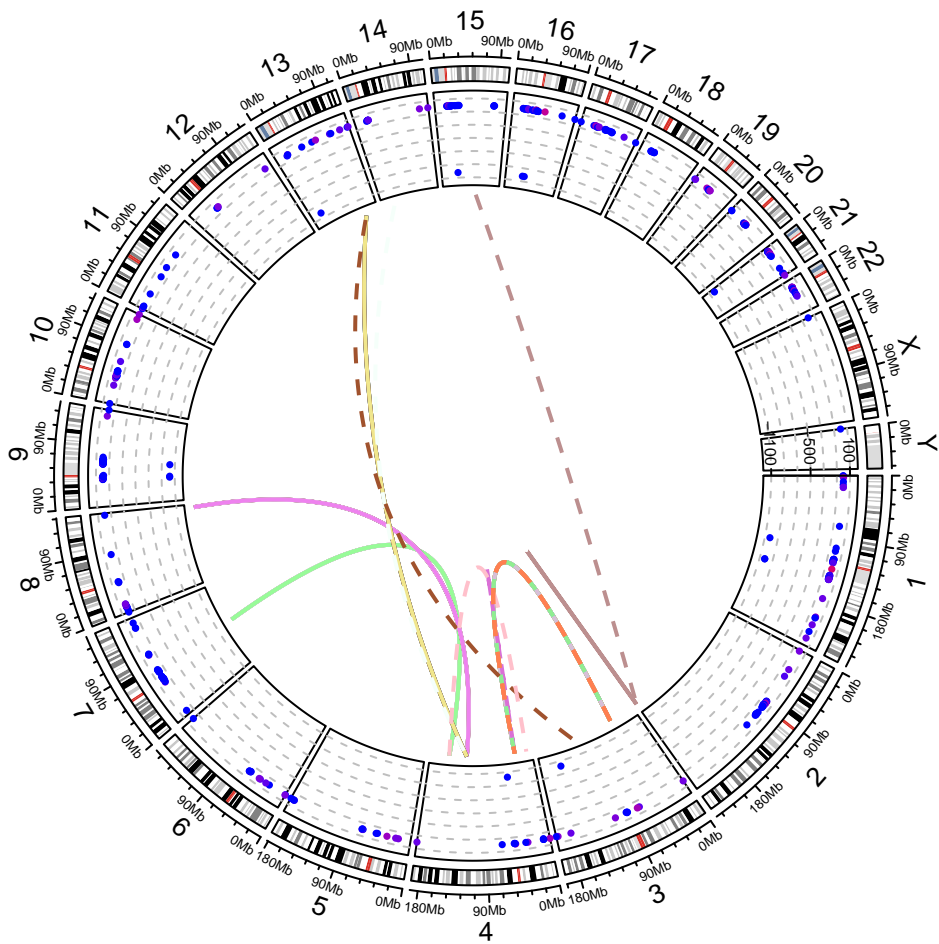

Supplement: Supplemental_Code_.zip [file T6.pdf › CIRCLIZE3/T6.pdf]

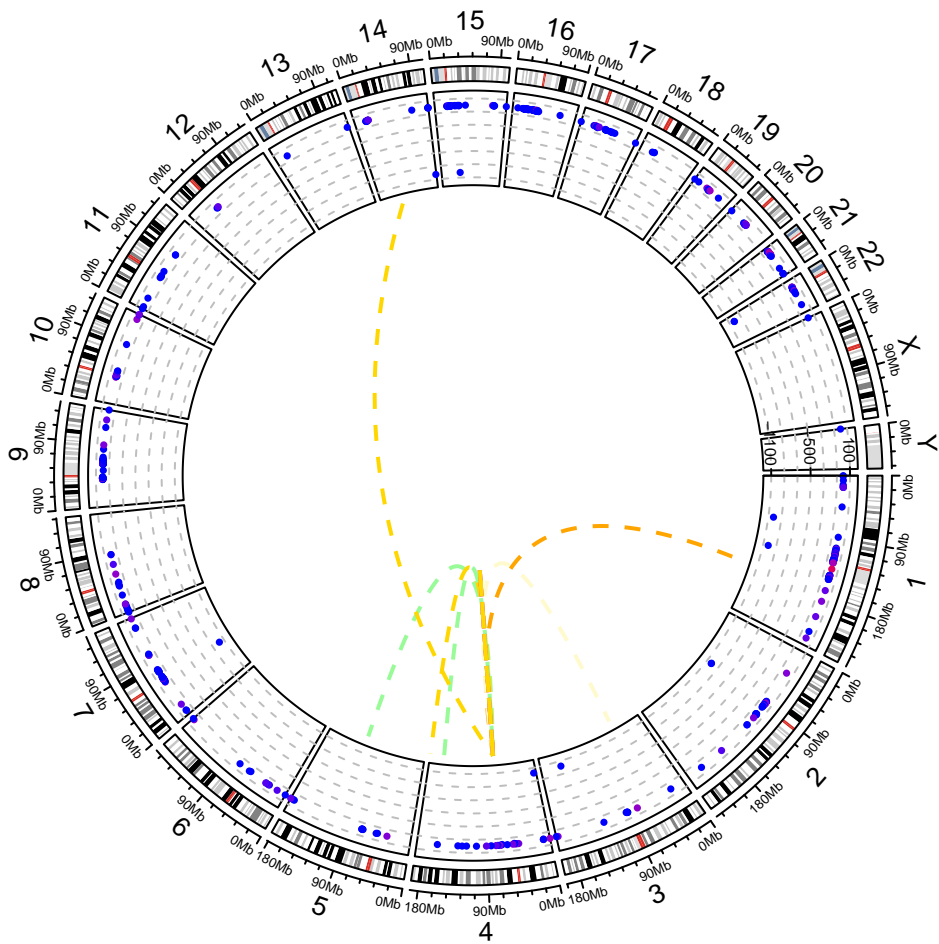

Supplement: Supplemental_Code_.zip [file T7.pdf › CIRCLIZE3/T7.pdf]
